# Supplementary material
Source: PubMed Central journal article supplement (PMC6258017)
Supplement: NIHMS1508942-supplement-1.pdf [file NIHMS1508942-supplement-1.pdf]

**Cell Reports, Volume 24**

**Supplemental Information**

**Repeated Antigen Exposure Extends  
the Durability of Influenza-Specific Lung-Resident  
Memory CD8<sup>+</sup> T Cells and Heterosubtypic Immunity**

**Natalija Van Braeckel-Budimir, Steven M. Varga, Vladimir P. Badovinac, and John T. Harty**

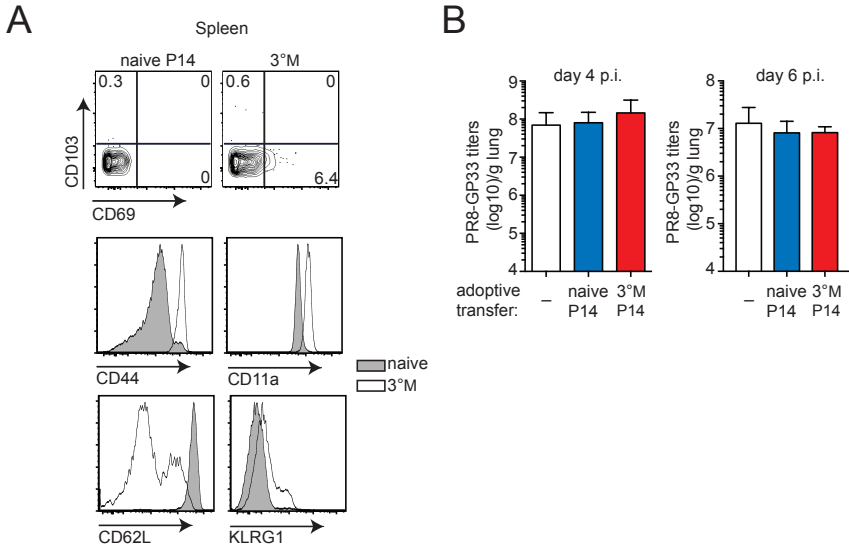

**Figure S1: Characterization of adoptively transferred cells and their impact on PR8-GP33 infection. Related to figure 1.**

(A) Phenotypic characterization of spleen-derived naive and 3°M P14 used for adoptive transfer and generation of 1°M and 4°M responses. (B) Naive C57Bl/6 recipients were seeded with  $10^4$  naive or  $10^5$  3°M P14 cells. 24h later these mice and naive mice were IN infected with PR8-GP33. PR8-GP33 virus titers measured at d4 and d6 p.i. in lungs of mice that received no P14 transfer (white), naive P14 transfer (blue) or 3°M P14 transfer (red).  $n=3-5$  mice/group. Representative of 2 independent experiments. Error bars represents mean $\pm$ SD. No significant differences, Kruskal-Wallis test.

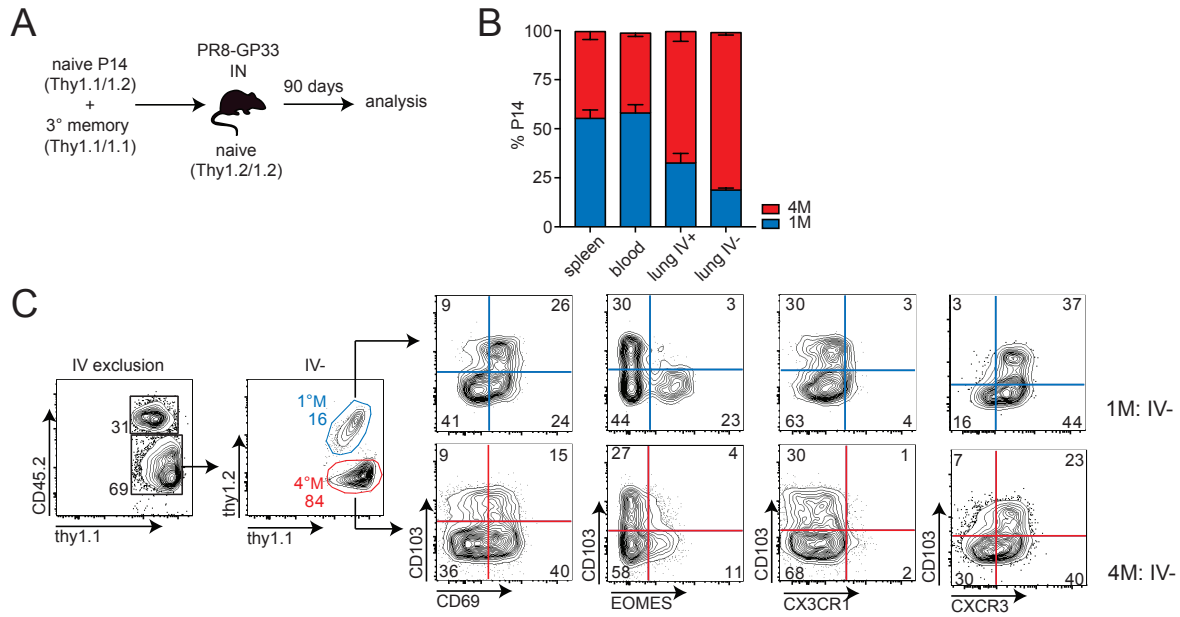

**Figure S2: Tissue distribution and phenotypic characterization of 1°M and 4°M P14 cells. Related to figure 1.**

(A) Naive Thy1.2/1.2 C57Bl/6 mice were seeded with a mixture of  $10^4$  naive Thy1.1/1.2 and  $10^5$  3°M P14 cells. 24h later mice were IN infected with PR8-GP33. Mice were analyzed 90 days p.i. (B) Distribution of 1°M and 4°M P14 cells in various tissue compartments expressed as a % of total P14.  $n=3$  mice/group. Representative of 2 independent experiments. Error bars represent mean $\pm$ SD. Two-way ANOVA with Tukey's multiple comparison test. Statistic summary: 1°M – blue (spleen vs bld ns; spleen vs lung IV<sup>+</sup> \*\* $p=0.0011$ ; spleen vs lung IV<sup>-</sup> \*\*\*\* $p<0.0001$ ; blood vs lung IV<sup>+</sup> \*\*\* $p=0.003$ ; blood vs lung IV<sup>-</sup> \*\*\*\* $p<0.0001$ ; lung IV<sup>+</sup> vs lung IV<sup>-</sup> ns); 4°M – red (spleen vs blood ns; spleen vs lung IV<sup>+</sup> \*\* $p=0.0011$ ; spleen vs lung IV<sup>-</sup> \*\*\*\* $p<0.0001$ ; blood vs lung IV<sup>+</sup> \*\*\* $p=0.0002$ ; blood vs lung IV<sup>-</sup> \*\*\*\* $p<0.0001$ ; lung IV<sup>+</sup> vs lung IV<sup>-</sup> ns). (C) Representative plots of phenotypic characterization of lung residing IV<sup>-</sup> 1°M (blue) and 4°M (red) P14 cells.

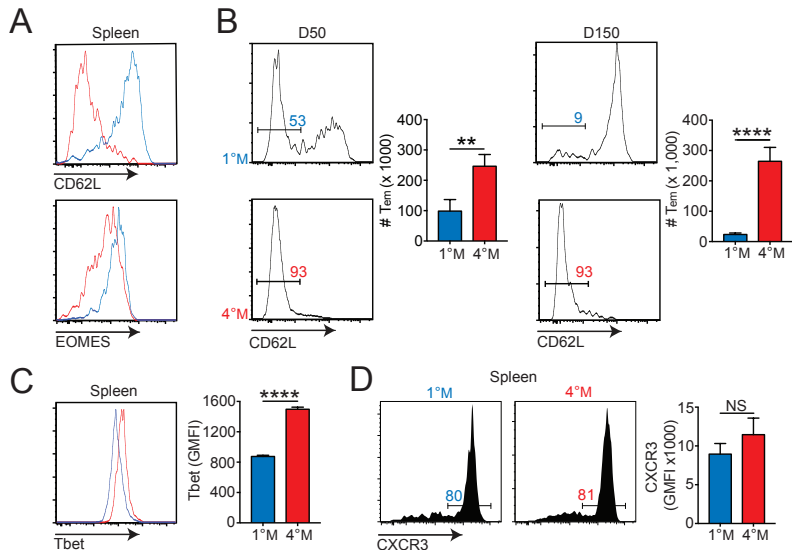

**Figure S3: Changes in  $T_{em}$ -defining and lung-homing properties of circulating 1°M and 4°M P14 cells.**

**Related to figure 3.**

(A) Expression of CD62L by spleen-derived 1°M (blue) and 4°M (red) P14 cells (representative histograms, left) and numbers of CD62L<sup>lo</sup>  $T_{em}$  cells (cumulative bar graphs, right) at D50 and D150 p.i.  $n=4$  mice/group. Representative of 2 independent experiments. Error bars represent mean $\pm$ SD. \*\* $p=0.0016$ , \*\*\*\* $p<0.0001$ , unpaired t test. (B) Representative histograms of expression of CD62L and EOMES by spleen-derived 1°M (blue) and 4°M (red) P14 cells 7 months p.i. (C) Expression of Tbet and (D) CXCR3 by spleen-derived 1°M (blue) and 4°M (red) P14 cells at D150 p.i. Representative histograms (left); cumulative data (right).  $n=4$  mice/group. Representative of 2 independent experiments. Error bars represent mean $\pm$ SD. \*\*\*\* $p<0.0001$ , unpaired t test.
